# Supplementary material
Source: MDPI journal article supplement (https://www.mdpi.com/2072-4292/9/3/247)
Supplement: s1 [file s1]

**Figure S1** – Supplementary material for “Combining spectral data and a DSM from UAS-images for improved classification of non-submerged aquatic vegetation” by Eva Husson, Heather Reese, and Frauke Ecke, *Remote Sensing*, **8**, 2017: Field images of taxa present at Lake Ostträsket

Nymphaeids (floating-leaved taxa):

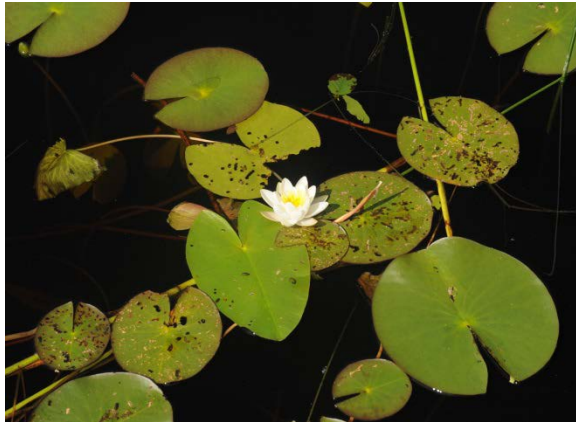

*Nuphar/Nymphaea spp.*  
(leaves 8–35 cm long)\*

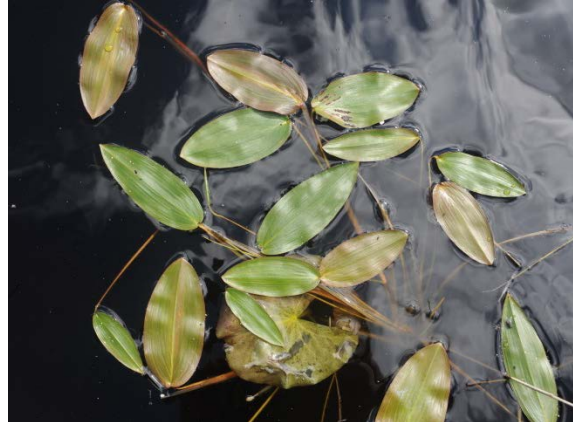

*Potamogeton natans*  
(leaves 5–10 cm long)\*

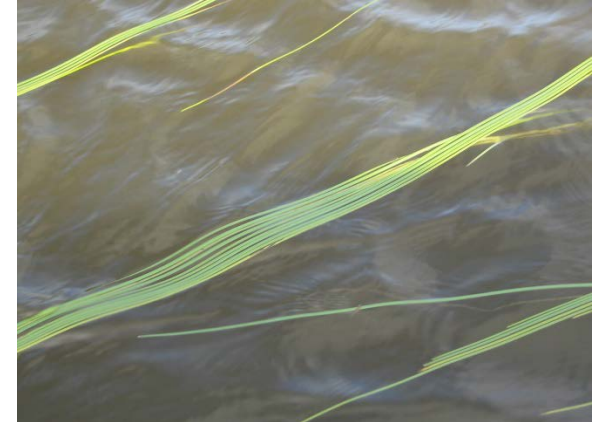

*Sparganium spp.*  
(leaves up to 1.5 m long)\*

Helophytes (emergent taxa):

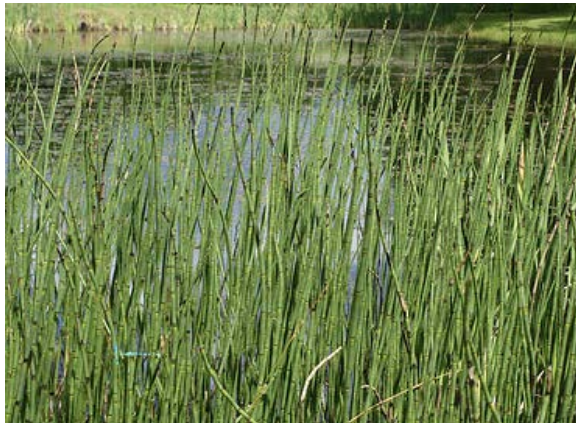

*Equisetum fluviatile*  
(height 0.3–1.5 m)\*

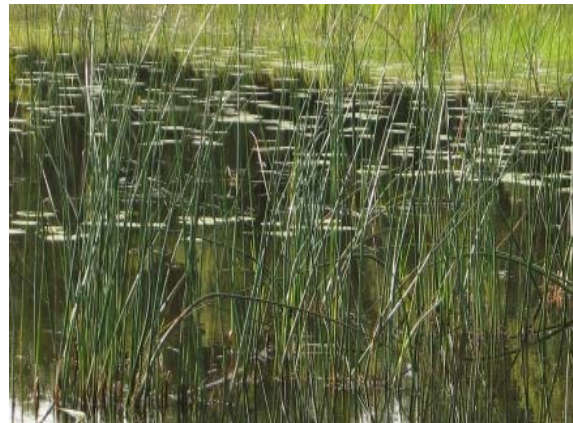

*Schoenoplectus lacustris*  
(height 1–3 m)\*

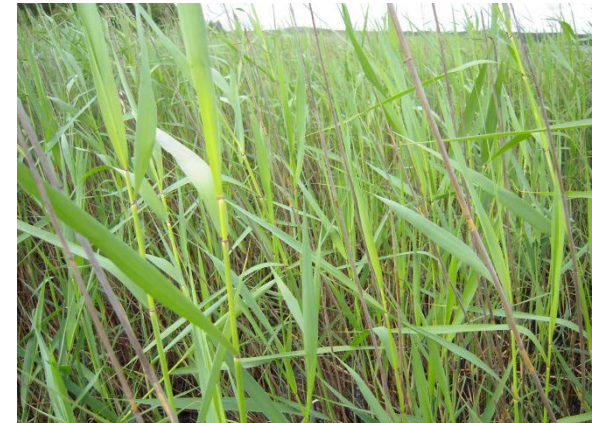

*Phragmites australis*  
(height 1–4 m)\*

\* Source: Mossberg, B.; Stenberg, L. *Den nya nordiska floran*. Wahlström & Widstrand: Aurskog, Norge, 2006.
